1 A novel method for monitoring ground-dwelling arthropods on hard substrates: characterizing  
2 arthropod biodiversity among survey methods

3 Katherine McNamara Manning<sup>1</sup>, Kayla I. Perry<sup>1,2</sup>, & Christie A. Bahlai<sup>1</sup>

4 <sup>1</sup> Department of Biological Sciences, Kent State University, Kent, Ohio, USA

5 <sup>2</sup> Department of Entomology, Ohio State University, Wooster, Ohio, USA

6 Abstract

7 Sampling approaches are commonly adapted to reflect the study objectives in biodiversity monitoring projects. This  
8 approach optimizes findings to be locally relevant but comes at the cost of generalizability of findings. Here, we  
9 detail a comparison study directly examining how researcher choice of arthropod trap and level of specimen  
10 identification affects observations made in small-scale arthropod biodiversity studies. Sampling efficiency of four  
11 traps: pitfall traps, yellow ramp traps, yellow sticky cards, and a novel jar ramp trap were compared with respect to  
12 an array of biodiversity metrics associated with the arthropods they captured at three levels of identification. We  
13 also outline how to construct, deploy, and collect jar ramp traps. Trapping efficiency and functional groups of  
14 arthropods (flying, crawling, and intermediate mobility) varied by trap type. Pitfalls and jar ramp traps performed  
15 similarly for most biodiversity metrics measured, suggesting that jar ramp traps provide a more comparable  
16 measurement of ground-dwelling arthropod communities to pitfall sampling than the yellow ramp traps. The jar  
17 ramp trap is a simple, inexpensive alternative when the physical aspects of an environment do not allow the use of  
18 pitfalls. This study illustrates the implications for biodiversity sampling of arthropods in environments with physical  
19 constraints on trapping, and the importance of directly comparing adapted methods to established sampling protocol.  
20 Future biodiversity monitoring schemes should conduct comparison experiments to provide important information  
21 on performance and potential limitations of sampling methodology.

22 Keywords: Trap performance, biodiversity monitoring, arthropod traps, insect traps, trap bias,  
23 pitfall trap

24 Introduction

25 There are many ways to observe populations and communities of insects. A vast literature of entomology  
26 studies aim to optimize trapping and monitoring methods for particular arthropod taxa and conservation goals  
27 (Agosti et al., 2000; Henderson & Southwood, 2016; Montgomery et al., 2021; O'Connor et al., 2019; Osborne et  
28 al., 2002). Specific trapping methods have been developed to reflect the arthropod community of interest as well as  
29 the physical or logistical constraints of the focal environment. Yet, this variability in sampling approach creates  
30 challenges for biodiversity monitoring. The effectiveness of conservation management programs is dependent on  
31 reproducible, reliable, and comparable data as these can impact biodiversity research outcomes, especially over time  
32 (Cardinale et al., 2018). Other challenges of biodiversity monitoring include errors in detection, misidentification,  
33 geographical constraints, and incomplete or biased views of the population or community (Saunders et al., 2019),  
34 especially as new survey formats are developed with technological advances and community science involvement  
35 (Isaac et al., 2020). Therefore, measurements of biodiversity are context-dependent, varying based on the methods  
36 used, and interacting with other elements from the environment that vary over time and space. Thus, the outcomes of  
37 biodiversity assessments that often inform conservation management strategies or policy are dependent on sampling  
38 methodology (Busse et al., 2022; Elphick, 2008; Gardiner et al., 2012; Prendergast et al., 2020; Saunders et al.,  
39 2019; Vallecillo et al., 2020; Whitworth et al., 2017).

40 Arthropod sampling methodology may be particularly prone to introducing contextual biases to data, which  
41 makes biodiversity monitoring difficult to approach in a comprehensive, standardized way (Montgomery et al.,  
42 2021). Each collection method has variable trapping efficiency that depends on arthropod biology and behavior as  
43 well as trap design (Montgomery et al., 2021). These biases do not eliminate the utility of the collected data, but  
44 additional information about the goals, constraints, and methods of a given experiment or monitoring strategy must  
45 be used to contextualize and understand the limitations and further use of these data. This contextual information  
46 also aids effective synthesis of data across biodiversity studies (Elphick, 2008). Within insect ecology, there is a  
47 strong cultural precedent of ‘do-it-yourself’ approaches for developing novel trapping methods, customized to a  
48 given situation (examples include: Bouchard et al., 2000; Dowd et al., 1992; Knuff et al., 2019; Owino, 2011; Russo  
49 et al., 2011; White et al., 2016). This customization tends to make the findings from arthropod surveys very  
50 adaptable, but results are also relatively contextually-specific. For example, insect traps are typically designed to  
51 catch a specific subset of a community, relevant to study goals. Sticky cards, flight intercept traps, and pan traps  
52 (also known as bee bowls) are all designed to catch flying insects. However, even among common sampling  
53 methods for flying insects, there is variation in trap design (for example, coloured pan/bowl trapping: Gonzalez et  
54 al., 2020; Joshi et al., 2015; Toler et al., 2005; Tuell & Isaacs, 2009; Vrdoljak & Samways, 2012).

55 Once samples are collected, further contextual biases may occur through the processing, identifying, and  
56 recording of arthropod biodiversity data. Because arthropods are numerically abundant and diverse, processing and  
57 identifying all specimens within samples can be a logistical challenge. The time and specialized taxonomic training  
58 required to identify arthropods beyond order or family level makes processing all samples to the species level an  
59 unrealistic goal for many studies. Depending on the study, researchers may address this challenge by focusing on a  
60 subset of individuals within a specific taxon or group of taxa. Alternatively, researchers may identify more  
61 individuals but at coarser taxonomic or functional classifications. This heterogeneity in the taxonomic resolution of  
62 arthropod data can make direct comparisons among studies difficult (Ferro & Summerlin, 2019) and has the  
63 potential to undermine ecological synthesis (Michener & Jones, 2012), but feasibility and goals of the study are still  
64 important to consider.

65 Use of common approaches may aid synthesis of monitoring data for arthropod populations, but may be  
66 constrained by the environments that these techniques are deployed in. For instance, pitfall traps are a commonly  
67 used method to sample ground-dwelling arthropods (Greenslade, 1964; Hohbein & Conway, 2018) and consist of a  
68 container filled with a killing fluid dug into the soil so that the rim is flush with the ground’s surface (Figure 1a).  
69 Although there are many benefits to using pitfall traps to sample ground-dwelling arthropods, there are several  
70 challenges and limitations. Importantly, there is not a standard trap design, material, or size for pitfall traps, which  
71 could impact syntheses across studies and global long-term monitoring of arthropod taxa (Brown & Matthews,  
72 2016; Hohbein & Conway, 2018; Spence & Niemelä, 1994). Furthermore, some environments do not support the  
73 installation of pitfall traps to sample ground-dwelling arthropod communities, which may inhibit or bias biodiversity  
74 monitoring programs for these habitats. For example, thin-soil environments such as alvars, rocky glades, barrens,  
75 and green roofs have surface substrates that are too shallow to install conventional pitfall traps. Some biodiversity  
76 studies have employed an alternative ramp pitfall trap design which consists of a container placed on the ground  
77 with one to four ramps leading into the container (Bostanian et al., 1983; Bouchard et al., 2000, 2005; Patrick &  
78 Hansen, 2013; Weary et al., 2019). Abundant and diverse ground beetle communities were captured using ramp  
79 traps in alvar habitats in Ontario, Canada (Bouchard et al., 2005). Community composition of ground-dwelling  
80 beetles and spiders was similar among pitfall and ramp traps in oak woodland and chaparral habitats (Weary et al.,  
81 2019). However, similar to pitfall traps, ramp traps do not have a standard trap design, material, or size, and in some  
82 cases, may be challenging to build and transport due to trap size and complexity (Weary et al., 2019).

83 The objective of this study was to investigate how the design of arthropod traps affect the observations of  
84 arthropod communities, particularly for trap designs that had been adapted to contend with physical constraints of  
85 their deployment environment. Specifically, we compared the performance of two traps designed to minimize

86 disruption to soil substrates to two classical trapping methods. We compared arthropod communities among  
87 traditional pitfall traps, commercially available ramp traps, sticky cards, and a novel, alternative design to the  
88 commercial ramp trap, the jar ramp trap. Herein, we outline how to construct and deploy jar ramp traps. We  
89 predicted that the arthropod community captured by each trap would vary based on the structure of the trap and the  
90 functional biology of the arthropods. In addition to comparing these four sampling methods, we compared how  
91 multiple approaches to insect identification may impact the findings. We predicted that different identification levels  
92 will produce variable statistical results, each revealing and obscuring different parts of the community, and  
93 suggesting tradeoffs between both trapping and sample processing approaches. We discuss recommendations for  
94 comparison studies which will improve the interoperability of data produced by specialized insect sampling  
95 methodology.

## 96 **Materials and Methods**

### 97 **Study sites**

98 We selected study sites with similar abiotic attributes to the thin-soil environments our adaptive traps were  
99 designed for: exposed to solar radiation, precipitation, and wind, but with deeper soils to accommodate the use of  
100 pitfall traps. We selected three mown horticultural grasslands in Northeast Ohio in the City of Kent, owned by Kent  
101 State University and operated by the Kent State University Center for Ecology and Natural Resource Sustainability.  
102 No pesticide, herbicide, or fertilizer was directly applied to any of the sampling locations for at least 12 months prior  
103 to our study.

### 104 **Arthropod sampling**

105 At each site, four trap types were deployed to sample arthropod communities: 1) pitfall traps; 2)  
106 commercially available yellow ramp traps; 3) commercially available yellow sticky cards; and 4) novel jar ramp  
107 traps. Two replicates of each trap type were installed 3-5 m apart at each site for 48 hours during a period of warm,  
108 dry weather every other week during the months of July, August, and September 2020, amounting to seven sampling  
109 periods and 21 location-date replicates in total. All traps used in this study have a common bias in that they only  
110 detect active arthropods that move into the trap rather than extract individuals from a given area of habitat. As with  
111 all passive trapping methods, samples are not a measurement of raw abundance, per se, but instead a measure of  
112 activity density. These captures are a good proxy for population abundance if activity rates are density independent  
113 (Didham et al., 2020).

114 Pitfall traps consisted of a 100 ml transparent plastic specimen container, 7.5 cm in height with a 4.5 cm  
115 diameter opening, filled with soapy water (Dawn Original Liquid Dish Soap, Procter & Gamble, Cincinnati, OH,  
116 USA) (using similar methodology to Cates et al., 2021; Sultaire et al., 2021; Wills et al., 2019) (Figure 1a). Yellow  
117 ramp traps (ChemTica Internacional S.A., Santo Domingo, Costa Rica) were square yellow plastic containers (14 x  
118 14 x 13 cm) with a roof and detachable ramps (30% slope) on four sides, placed on the ground's surface and filled  
119 with soapy water (Figure 1b). A small sandbag (sand inside quart zipper-top bag) was placed on top of the roof to  
120 minimize movement of the trap in windy conditions. These ramp traps are commercially available but have not been  
121 extensively tested in the field to sample ground-dwelling arthropod communities. In a survey of North American  
122 Great Lakes Basin thin-soil environments our group observed high numbers of flying insects in these commercially  
123 available ramp traps, while characteristic ground-dwelling arthropod taxa were absent. Yellow sticky cards  
124 (Pherocon, Zoecon, Palo Alto, CA, USA) were cut in half to limit disturbance by wind (11x14 cm) and affixed to  
125 wire stands, positioning the top of the card approximately 30 cm off the ground (Figure 1c). Because the commercial  
126 ramp trap collected primarily flying insects in our previous survey, we included sticky cards in the trap comparison  
127 to examine any overlap in community composition with the ground-dwelling arthropod traps. Jar ramp traps were  
128 constructed using a 41 cm x 41 cm square of noseem mesh attached to the rim of an open, shallow clear glass Ball

129 jar (Ball Corporation, Broomfield, CO, USA) (236 ml, 7.5 cm diameter, 5 cm height) filled with soapy water, with  
130 small rocks or stones to secure the mesh to the ground (Figure 1d). The jar ramp trap was engineered to address  
131 some structural issues with the commercial trap, improve the sample handling experience, and collect arthropod  
132 communities that more closely match a pitfall trap.

133 Trap contents were collected after 48 hours. Samples from the yellow ramp traps were strained with  
134 noseem mesh in the field and preserved in 70% ethanol in gallon plastic zipper-top bags. Yellow sticky cards were  
135 placed directly into gallon plastic zipper-top bags. Jar ramp traps and pitfall traps had plastic lids secured on the  
136 glass jar or plastic container, respectively, directly in the field. Samples were processed in the laboratory and  
137 specimens were identified with the aid of a dissecting microscope. For the duration of the study, yellow sticky cards  
138 were stored in the freezer and all other samples in vials with 70% ethanol.

139 In contrast to the commercial yellow ramp trap, the ramps on the jar ramp traps were at a lower angle and  
140 the noseem mesh provided a substrate that was easier to grip than the smooth plastic. Additionally, the design of  
141 the jar ramp trap improved handling and sample collection in the field, as a plastic lid easily seals the sample jar in  
142 the field until sampling processing in the laboratory. Construction of the jar ramp trap began by cutting a square of  
143 mesh (approximately 41 by 41 cm). The lid was removed from the Ball jar, flat piece discarded, and the screw band  
144 reattached. A thin layer of glue (Gorilla Heavy Duty Construction Adhesive, Gorilla Glue, Cincinnati, OH, USA)  
145 was applied around the top of the screw band (Figure 2b). The mesh square was placed over the opening of the jar  
146 and screw band, with the jar in the center of the mesh, and secured to the screw band by applying light pressure  
147 (Figure 2c). This was left to dry for the recommended time on the glue instructions. Then, using a utility knife, we  
148 cut out the mesh on the inside of the jar opening. This left us with a plain glass jar and a detachable “ramp” (Figure  
149 2d). To deploy the trap, we attached the mesh ramp to the Ball jar, adjusting so that the edges were flat. The outer  
150 edges of the mesh were lined with small stones. The Ball jar was filled to the top with soapy water: a gallon of water  
151 with about 1 teaspoon of Dawn Original dish soap (Figure 1d). For trap collection, the stones were removed, then  
152 the mesh ramp was gently unscrewed from the jar and a plastic lid was screwed onto the jar. The samples could now  
153 be transported, with light padding, and temporarily stored for up to one week (Figure 2e). Jars, ramps, and plastic  
154 lids were easily washed and reused.

## 155 **Arthropod identification**

156 To examine the impact of specimen identification approach on observations, specimens were identified  
157 using three approaches: taxonomic order, functional classification, and focal taxa to species/genus. To conduct the  
158 order-level classification, all arthropod specimens collected were determined to their taxonomic order using Borror  
159 & White, 1998 and Marshall, 2017. For functional classification, arthropods were categorized based on primary  
160 mobility: flying, crawling, or intermediate (Borror & White, 1998; Evans, 2014; Marshall, 2017). Intermediate  
161 means that they are ground-dwelling arthropods that may have the capability of flying (i.e. Carabidae,  
162 Staphylinidae), have wings but primarily jump (i.e. Cicadellidae, Orthoptera), or adults that may or may not have  
163 wings (i.e. Aphididae). Specimens were identified to order (Acarina, Araneae, Collembola, Diptera, Lepidoptera,  
164 Orthoptera, Thysanoptera, Zygoptera), superfamily (Apoidea, Chalcidoidea, Ichneumonoidea), group (“wingless  
165 parasitoid wasps”), or family. This was modeled after studies that used this mixed approach of identifying for other  
166 insect functional classifications such as natural enemy or herbivore (Fiedler & Landis, 2007; Gibson et al., 2019), or  
167 predators (Hermann et al., 2019; Mabin et al., 2020). For the focal taxa approach, specimens captured from three  
168 functionally-important beetle (Order Coleoptera) families were identified to the highest taxonomic resolution  
169 possible (genus or species). For these determinations, we focused on individuals from Carabidae (Lindroth, 1961-  
170 1969), Staphylinidae (Brunke et al., 2011; Klimaszewski et al., 2018), and Coccinellidae (Evans, 2014; Gardiner et  
171 al., 2006; Gardiner, 2015).

172

## 173 Statistical analyses

174 All statistical analyses were completed using R 4.1.3 (R Core Team, 2022). Unless otherwise noted, all  
175 analyses were performed at each level of arthropod identification (taxonomic order, functional classification, and  
176 focal taxa to species/genus). Data were evaluated for statistical assumptions of normality and homogeneity of  
177 variance. Accumulation curves for each trap type were created using the *BiodiversityR* package (Kindt & Coe,  
178 2005). To estimate sampling efficiency for each trap type, we used nonparametric Jackknife order 1 estimator to  
179 compare observed and estimated richness. Abundance (number of arthropods per trap), taxonomic richness (number  
180 of taxa per trap), Shannon diversity index (Hill, 1973), and Pielou's evenness index (Pielou, 1966) were calculated  
181 using the *vegan 2.5-7* package (Oksanen et al., 2019).

182 Generalized linear mixed effects models (GLMM) were developed using the *lme4* (Bates et al., 2015) and  
183 *lmerTest* (Kuznetsova et al., 2017) packages to examine differences in arthropods among trap types. The response  
184 variables examined were arthropod abundance, richness, diversity, and evenness. Each GLMM included trap type  
185 and sampling date as categorical fixed effects and trap number nested within the site as a random effect. The global  
186 model took the form: *Response variable ~ Trap + Date + (1|Site:Replicate)*. For response variables involving count  
187 data, the Poisson family error structure was initially specified. Models examining arthropod abundance at the order  
188 and functional level failed to meet model assumptions and were given the negative binomial error structure instead.  
189 The categorical fixed effect date was excluded from GLMMs examining functional level arthropod diversity and  
190 evenness to meet model assumptions. The function 'Anova' from the *car* package (Fox & Weisberg, 2019) was used  
191 to examine significance of trap type in each model. Tukey pairwise comparisons were performed using the *emmeans*  
192 *1.7.4-1* package (Lenth, 2021) for all models.

193 For the functional classification level of identification, we also performed a functional group analysis in  
194 which specimens were classified into groups of crawling, flying, or intermediate mobility (excluding groups where  
195 insufficient identification prevented assigning a functional role) to assess differences in abundance and richness by  
196 trap type using generalized linear models with the form: *Response variable ~ Trap*. Negative binomial error  
197 structure was used for abundance models because they failed to meet normality assumptions. Similar to the  
198 GLMMs, models were developed using the *lme4* and *lmerTest* packages, and Tukey pairwise comparisons were  
199 performed using the *emmeans 1.7.4-1* package.

200 To characterize the arthropod communities collected by each of the four trap types, we used non-metric  
201 multidimensional scaling (NMDS, with Bray-Curtis distance). Permutational multivariate analysis of variance  
202 (PERMANOVA), analysis of multivariate homogeneity of group dispersions (BETADISPER), and pairwise  
203 multilevel comparison using Adonis were performed following each NMDS analysis to assess compositional  
204 dissimilarity between trap types. NMDS, PERMANOVA, and BETADISPER were computed using functions in the  
205 *vegan 2.5-7* package. Pairwise adonis was performed using the *pairwiseAdonis* package (Martinez Arbizu, 2020).

## 206 Results

207 Seven sampling periods at our three sites yielded 165 samples (accounting for three pitfalls lost to  
208 disturbance by mammal excavation), which contained a total of 13,634 arthropod specimens. Overall, yellow ramp  
209 traps caught the greatest number of individuals (7,758); followed by sticky cards (4,199); then jar ramp traps  
210 (1,099); with pitfall traps catching the least (578) (see abundances by identification level: Table S1). Trap types had  
211 openings of various sizes (Figure S1). The capture of functional groups of arthropods (flying, crawling, or  
212 intermediate) and individual taxonomic groups varied by trap type.

213



## 214 **Order-level analysis**

215 The total number of orders captured varied from 9 (pitfall traps) to 12 (yellow ramp traps and jar ramp  
216 traps) (Figure 3a). When compared with first order jackknife richness estimates, pitfall trap efficiency was 90%;  
217 yellow ramp trap efficiency was 100%; yellow sticky card efficiency was 100%; and jar ramp trap efficiency was  
218 86%.

219 Overall differences in richness, abundance, Shannon diversity, and evenness were observed between the  
220 trap types in generalized linear mixed effect models (Table S2; Figure 4a). Higher arthropod richness, abundance,  
221 and diversity were observed in yellow ramp traps than other trap types. For richness and abundance, yellow ramp  
222 traps were followed by yellow sticky traps, jar ramp traps, and pitfall traps, all of which differed statistically from  
223 each other. Compared to yellow ramp traps, all other trap types captured similar levels of arthropod diversity. Pitfall  
224 traps and jar ramp traps had high arthropod evenness compared to yellow ramp traps and sticky cards.

225 Community composition varied between all trap types at the order level ( $p = 0.001$ , Figure 5a).  
226 Homogeneity of multivariate dispersion could not be assumed, indicating that some trap types had more variable  
227 community composition than others.

## 228 **Functional-level analysis**

229 The total unique taxa captured varied from 21 (pitfalls) to 35 (yellow ramp traps) (Figure 3b). The flying  
230 group consisted of 22 taxa with a mean abundance across all trap types of  $43.2 \pm 16.3$  and mean richness of  $3.9 \pm$   
231  $0.9$ . The crawling group consisted of five taxa with a mean abundance across all trap types of  $18.4 \pm 8.1$  and mean  
232 richness of  $2.6 \pm 0.5$ . The intermediate group consisted of 10 taxa with a mean abundance across all trap types of  
233  $20.5 \pm 15.9$  and mean richness of  $1.7 \pm 0.3$  (Table S1). When compared with first order jackknife richness estimates,  
234 pitfall trap efficiency was 84%; yellow ramp trap efficiency was 84%; yellow sticky card efficiency was 84%; and  
235 jar ramp trap efficiency was 79%.

236 Overall differences in richness, abundance, Shannon diversity, and evenness were observed between the  
237 trap types in generalized linear mixed effect models (Table S2; Figure 4b). Similar to the order level analyses,  
238 yellow ramp traps collected the highest richness, abundance, and diversity. Jar ramp traps and pitfall traps collected  
239 the lowest richness. For abundance, yellow ramp traps were followed by yellow sticky cards, jar ramp traps, and  
240 pitfall traps, all of which differed statistically from each other. Compared to yellow ramp traps, all other trap types  
241 captured similar levels of diversity. Pitfall traps and jar ramp traps had the highest evenness, followed by yellow  
242 ramp traps and sticky traps.

243 Community composition varied between all trap types when taxa were grouped by functional classification  
244 ( $p = 0.001$ , Figure 5b). As with the order-level analysis, homogeneity of multivariate dispersion could not be  
245 assumed.

246 Arthropod abundance and richness in each trap type were then compared by functional group (flying,  
247 crawling, or intermediate) (Table S3; Figure 6). Sticky cards and yellow ramp traps captured the highest abundance  
248 and richness of flying arthropods. Yellow ramp traps captured the highest abundance and richness of crawling  
249 arthropods. Yellow sticky cards captured the lowest abundance and richness of crawling arthropods. Yellow ramp  
250 traps captured the highest abundance and richness of intermediate mobility arthropods. Richness of intermediate  
251 mobility arthropods was low overall, and captures were fairly consistent among other trap types.

252  
253

## 254 Focal taxon analysis

255 Six specimens comprising three species of Carabidae were collected: *Cicindelidia punctulata* (Olivier),  
256 *Cratacanthus dubius* (Palisot de Beauvois), and *Harpalus faunus* (Say). Twenty-one adult specimens (larvae were  
257 not identified to species) comprising seven species of Coccinellidae were collected: *Brachiacantha ursina*  
258 (Fabricius), *Coleomegilla maculata* (Degeer), *Cycloneda munda* (Say), *Harmonia axyridis* (Pallas), *Hippodamia*  
259 *variegata* (Goeze), *Hyperapis undulata* (Say), and *Propylea quatuordecimpunctata* (Linnaeus). Staphylinidae were  
260 identified to genus. Sixteen specimens comprising five genera were identified: *Acrotona*, *Meronea*, *Rabigus*,  
261 *Stenus*, and *Xantholinus*. Four staphylinid specimens were damaged and could not be identified.

262 The total number of focal taxa captured varied from 3 (pitfalls and jar ramp traps) to 9 (yellow sticky cards)  
263 (Figure 3c). When compared with first order jackknife richness estimates, pitfall trap efficiency was 78%; yellow  
264 ramp trap efficiency was 69%; yellow sticky card efficiency was 77%; and jar ramp trap efficiency was 78%.

265 There were no differences in richness, abundance, Shannon diversity, or evenness detected between trap  
266 types in generalized linear mixed effects models (Table S2; Figure 4c), likely due to sparse data.

267 Community composition varied by trap type ( $p = 0.003$ ), but only some trap comparisons were statistically  
268 significantly different: pitfall traps and yellow sticky cards and jar ramp traps and yellow sticky cards. However,  
269 because data was sparse, NMDS results failed to converge. Homogeneity of multivariate dispersion was assumed.

## 270 Discussion

271 Ultimately, biodiversity trends observed in any study are highly sensitive to sampling methodology  
272 (Berglund & Milberg, 2019; Brice et al., 2021; Gardiner et al., 2012; Joshi et al., 2015; O'Connor et al., 2019;  
273 Prendergast et al., 2020; Whitworth et al., 2017). For example, in a European bumble bee survey the three methods  
274 used all produced different estimates of the population (Wood et al., 2015). The results of the present study are no  
275 exception. Even between methods specifically adapted to particular habitat structures, traps captured different  
276 arthropod communities. However, our study also suggests an important caveat: the ability to detect differences  
277 between sampling types is also affected by sample size. Studies that focus at a high taxonomic resolution will  
278 require many more individual samples to be able to detect differences. Our analyses of focal taxa were not able to  
279 detect statistical trends due to the relatively small number of specimens from each group.

280 In our study, the jar ramp trap and pitfall trap communities were very similar, suggesting they had similar  
281 performance when deployed in the environment. For both the order and functional classification levels, no  
282 differences were observed among jar ramp traps and pitfall traps for the majority of the biodiversity metrics. When  
283 broken down by functional mobility groups, jar ramp and pitfall traps had similar richness and abundance of  
284 crawling arthropods, which is their target mobility group. Pitfall traps are commonly and widely used to sample  
285 ground-dwelling arthropods (Greenslade, 1964; Southwood, 1978), and these findings suggest that jar ramp traps are  
286 a suitable alternative design. These two trap types also had similar intermediate mobility richness, a functional group  
287 which includes ground-dwelling arthropods that walk or run on the soil surface, but may be capable of flight, such as  
288 beetles in the families Carabidae and Staphylinidae (Larochelle & Larivière, 2003; Levesque & Levesque, 1995).  
289 For example, in a study of ground beetles in thin-soiled alvar environments, 91% of species captured had fully  
290 developed hind wings, making them capable of flight (Bouchard et al., 2005). Analyses of community composition  
291 among jar ramp and pitfall traps indicated large overlap at the order and functional level, further supporting the  
292 comparable measurement of these trap types. Jar ramp traps should be considered when pitfall sampling cannot be  
293 used, for example in areas with shallow soils that do not allow for pitfall traps to be placed into the ground.

294            Though ramp traps are an alternative method to sample the ground-dwelling arthropod community without  
295 disturbing the substrate (Bouchard et al., 2000; Patrick & Hansen, 2013; Weary et al., 2019), we found that yellow  
296 ramp traps were not a sufficient alternative to pitfall traps. In a preliminary study using the yellow ramp traps as our  
297 primary means of collecting ground-dwelling arthropods, we observed one carabid individual, and had initially  
298 concluded that these bioindicators (Koivula, 2011; Rainio & Niemela, 2003; Serap & Luff, 2010) were rare at our  
299 sample sites. In this study, yellow ramp traps captured a community of arthropods dominated by flying taxa that was  
300 more similar to yellow sticky cards than pitfall traps or jar ramp traps. Yellow sticky cards, or glue traps, are a  
301 commonly used methodology for sampling flying populations of insects, especially in agricultural ecosystems  
302 (Aliakbarpour & Rawi, 2011; Bahlai et al., 2015; Gardiner et al., 2009; Li et al., 2021; Muppudathi et al., 2018;  
303 Musters et al., 2021). The bright yellow color of the yellow ramp trap may result in a similar attractiveness to flying  
304 arthropods as observed for yellow sticky cards (Shimoda & Honda, 2013; Shin et al., 2020). The yellow ramp trap  
305 captured a higher abundance, richness, and Shannon diversity than the jar ramp trap, pitfall trap, or yellow stick card  
306 in the order and functional level analyses. This pattern is likely due to the yellow ramp trap collecting ground-  
307 dwelling and flying arthropods, which is supported by the overlap in community composition among these trap  
308 types. Therefore, these numbers may be misleading, as the trap was designed to sample ground-dwelling arthropods,  
309 and thus may not be an authentic measurement of function in ground-dwelling communities when it is catching the  
310 flying community as well. Traps capturing a higher number of non-target arthropods may obscure biodiversity  
311 trends associated with a study's goals depending on the level of taxonomic resolution. For instance, in a native bee  
312 survey in an agroecosystem in Pennsylvania, blue vane traps captured the greatest richness and abundance, however,  
313 they were trapping higher ratios of common bees to rare bees compared to the pan traps used in the study (Joshi et  
314 al., 2015).

315            Our findings highlight the contextual dependence of insect sampling methodologies. Although the  
316 commercial yellow ramp traps were designed to collect ground-dwelling arthropods, these traps have often been  
317 used in conjunction with a chemical lure. For example, in the literature these yellow ramp traps are most commonly  
318 used to target large, ground-dwelling pest weevil species in agricultural landscapes (Oehlschlager et al., 2002;  
319 Reddy et al., 2008; Reddy et al., 2009). Because yellow ramp traps are used with a lure in these circumstances, the  
320 biology and behavior of target pest taxa were able to overcome the structural issues that these traps presented to  
321 other arthropods when used in the context of passive trapping. Although yellow ramp traps are commercially  
322 available and do capture a variety of ground-dwelling and flying arthropods, considerations should be made about  
323 the goals of the study before employing these traps to passively sample arthropod communities.

324            Having an alternative trap for ground-dwelling insects is a necessity in situations where researchers are  
325 physically constrained from using pitfall traps. The novel jar ramp trap is inexpensive, easy and quick to construct,  
326 and simple to deploy, even in comparison to other homemade ramp traps (Bouchard et al., 2000; Patrick & Hansen,  
327 2013; Weary et al., 2019). The plastic lids make sample collection and transport very user-friendly. The yellow ramp  
328 trap required users to remove the four ramps from the trap, drain the contents, and transfer them to another container  
329 with ethanol in the field. This was cumbersome and created opportunities for specimen loss. Additionally, removal  
330 and reattachment of ramps often broke the connection point on the trap. On the jar ramp trap, noseem mesh served  
331 as a 360 degree ramp around the collection jar. With the aid of the rocks, the mesh ramp blends in relatively well in  
332 the environment. The mesh ramp creates a coarse surface which insects appear to have no trouble crawling on,  
333 compared to slick plastic ramps of the commercial traps, and the breathable, light colored material may create less of  
334 a change in microclimate than the yellow plastic on hot days.

335  
336            Though the jar ramp trap has many advantages over the yellow ramp trap, and performed similarly to pitfall  
337 traps, it does have limitations. The Ball jar is only 5 cm deep, so leaving the traps deployed for an extended period  
338 of time may result in issues such as evaporation of the collection fluid or flooding in the case of heavy rainfall.  
339 Larger jars could easily be adapted to this design, however, at the compromise of ramp steepness. Although the  
340 rocks provide a natural means of securing the noseem mesh to the ground, the presence of rocks could affect



341 movement of some ground-dwelling arthropods. In spaces where some substrate exists, the traps may be lightly  
342 covered by soil to secure the mesh.

343 Our study demonstrated that the level to which taxa are identified impacts the study results and researcher  
344 interpretation of the biodiversity data. In this study, arthropods were identified using three approaches (i.e.  
345 taxonomic order, functional classification of mobility, and focal taxa to genus/species), and each level of  
346 identification provided different information about the arthropod communities. For example, clear patterns among  
347 trap types were observed at the order and functional levels of identification, but there was insufficient data at the  
348 focal taxa level. The order level may be the most comparable across biodiversity monitoring studies because it  
349 requires less taxonomic expertise and fewer samples to reach high sampling efficiency. However, this coarse level  
350 of identification can miss information that may be vital to the goals of the study. In this study, identification to order  
351 did not allow us to examine whether the trap types were capturing ground-dwelling arthropods because orders  
352 contain species of diverse functional mobility groups. For example, Order Hymenoptera is composed of wasps and  
353 bees, which fly, and ants, most of which crawl. In contrast, a relatively small number of specimens were collected of  
354 the focal beetle taxa, which resulted in the lower estimated sampling efficiency of 79%. Although sampling  
355 efficiency at the species level was lower than at the order level, this estimate is comparable to other studies that  
356 investigate arthropod communities using species level taxonomic resolution. Ground beetles collected using  
357 unbaited pitfall traps in greenspaces within nearby Cleveland, Ohio documented 69% of the estimated species  
358 richness in one year of study and 66% the next (Perry et al., 2020).

359 Classification of arthropods by functional mobility groups provided an additional dimension of biodiversity  
360 data that harnessed ecological life history information for each taxonomic group. The functional classification level  
361 of identification provided a compromise between the relative speed at which samples could be enumerated, similar  
362 to the order level classification, but with more meaningful interpretation of results based on arthropod biology. This  
363 classification scheme allowed us to examine captures among trap types based on their primary mobility, which  
364 facilitated our understanding of how trap design influences the observations of arthropod communities. Importantly,  
365 the use of functional traits to study patterns of biodiversity has several advantages. Functional traits provide a  
366 stronger connection to ecosystem processes and function than taxonomic measures of diversity such as abundance  
367 and diversity (Gagic et al., 2015), and have a greater comparative applicability across habitats and ecosystems  
368 (Webb et al., 2010). Therefore, functional classifications provide a complementary approach to traditional  
369 taxonomic metrics that can improve biodiversity monitoring programs with minimal additional effort.

370 Although the focal beetle taxa required larger sample sizes to detect differences that may exist among trap  
371 types, we still observed some members of the important predatory beetle families Carabidae, Staphylinidae, and  
372 Coccinellidae as well as which trap types captured them (Table S1). This allowed us to dive deeper into two ground-  
373 dwelling, intermediate mobility families (Carabidae and Staphylinidae) and one flying family (Coccinellidae). Three  
374 species within the family Carabidae were collected during this study. *C. punctulata* and *H. faunus* are macropterous  
375 (i.e. have fully developed wings), and thus, associated with greater dispersal ability as this trait renders them capable  
376 of flight (Larochelle & Larivière, 2003). *C. dubius* is wing-dimorphic, meaning individuals can be either  
377 macropterous or brachypterous (i.e. reduced wings, incapable of flight) (Larochelle & Larivière, 2003).  
378 Interestingly, each ground-dwelling trapping method caught a different species: pitfall traps caught all three *H.*  
379 *faunus*; a yellow ramp trap caught the single *C. dubius*; and jar ramp traps caught the two *C. punctulata*. Five genera  
380 of Staphylinidae were identified in the study. The predatory genus *Stenus* has large bulbous eyes, is uniquely  
381 diurnal, and can move on water by the release of an alkaloid from their abdomen (Evans, 2014; Gardiner, 2015).  
382 Compared to species of Carabidae, staphylinid genera were more evenly spread among the different trap types, but  
383 yellow ramp traps and yellow sticky cards captured the majority of individuals. Only one specimen each of *Rabigus*  
384 (in yellow ramp), *Stenus* (in yellow ramp), and *Xantholinus* (on yellow sticky card) were observed. The remaining  
385 and most abundant individuals belonged to *Acrotoma* (in yellow and jar ramp traps) and *Meronera* (all trap types).  
386 Seven species of Coccinellidae were captured during the study, with over 70% of the lady beetle specimens

387 collected by yellow sticky cards, which are considered reliable traps for measuring activity density in this family  
388 (Bahlai et al., 2013). Yellow ramp traps captured some lady beetles as well, but neither the pitfall nor the jar ramp  
389 trap captured this taxon reliably.

390 It is not uncommon for biodiversity monitoring to occur in sensitive habitats with unique constraints,  
391 requiring customized approaches to monitoring. However, these modifications to standardized trapping methods  
392 limit the comparability of study findings. This study illustrates the implications for biodiversity sampling of  
393 arthropods in environments with physical constraints on trapping, and the importance of directly comparing adapted  
394 methods to established sampling protocol. We have shown that conducting a comparison of those methods can  
395 provide important contextual information on how that method performs, and its potential limitations in monitoring  
396 protocol.

397 Comparison studies should ideally be conducted in the environment where monitoring will occur.  
398 However, in our case the thin-soil environments that jar ramp traps and yellow ramp traps are meant for did not  
399 allow for the use of pitfall traps. By conducting the comparison in an environment with similar abiotic attributes as  
400 thin-soil sites, we were able to comprehensively examine the efficacy of these trap types to inform future arthropod  
401 monitoring study designs in these sensitive habitats. This study leverages sites that were accessible and relatively  
402 uniform in environmental conditions to demonstrate that such comparisons of methodology can be relatively small  
403 scale and accomplished with limited labor. Indeed, the experimental work for this study was completed on a  
404 university campus when travel and support labor was highly limited by the COVID-19 lockdown.

405 Despite its importance to environmental management, developing standards for biodiversity monitoring  
406 comes with many challenges. Between idiosyncratic biology of target taxa and habitat effects on trapping efficiency,  
407 and indeed, trap structure, it becomes essential to compare modified trapping methodology against standards to  
408 ensure transferability of data. Future biodiversity monitoring schemes, especially those occurring in sensitive or  
409 unusual habitats, should conduct comparison experiments to maximize the chances of capturing target taxa, while  
410 minimizing disturbance to their habitat and thus, activity patterns of taxa, as well as fostering future ecological  
411 synthesis.

412

413

414

415

416

417

418

419

420

421

422

## 423 **Acknowledgments**

424 Data used in our study was collected on the ancestral and contemporary lands of the Erie and Seneca peoples where Kent, Ohio is  
425 currently located. The Kent State University Center for Ecology and Natural Resource Sustainability and their director Lauren  
426 Kinsman-Costello allowed for the use of properties to conduct this research. Kent State University Facilities Management,  
427 especially the Care of Grounds Crew and their director Rebekkah Berryhill coordinated grounds care around our sampling.  
428 Particular thanks to Julia Perrone, MLIS for assistance in trap and experimental design and Timothy D. Niepokny for assistance  
429 in the field. This work was completed with the support of a grant from the National Science Foundation Faculty Early Career  
430 Development Program from the Division of Biological Infrastructure (DBI 2045721) to CB.

## 431 **Conflict of Interest**

432 We have no competing interests.

## 433 **Author Contributions**

434 KMM and CB conceived research. KMM conducted experiments. KMM and KP analyzed data and conducted statistical analyses  
435 with the aid of CB. KMM wrote the article with critical revisions by CB and KP. CB secured funding. All authors read and  
436 approved the manuscript.

## 437 **Data Availability**

438 Data and relevant code for this research work are stored in GitHub: [https://github.com/katiemanning/jar\\_ramp\\_trap](https://github.com/katiemanning/jar_ramp_trap) and have  
439 been archived within the Zenodo repository: <https://doi.org/10.5281/zenodo.6994127>.

## 440 **References**

- 441  
442 Agosti, D., Majer, J. D., Alonso, L. E., & Schultz, T. R. (Eds.). (2000). *Ants: Standard methods*  
443 *for measuring and monitoring biodiversity*. Smithsonian Institution Press.
- 444 Aliakbarpour, H., & Rawi, C. S. Md. (2011). Evaluation of Yellow Sticky Traps for Monitoring the  
445 Population of Thrips (Thysanoptera) in a Mango Orchard. *Environmental Entomology*,  
446 *40*(4), 873–879. <https://doi.org/10.1603/EN10201>
- 447 Bahlai, C. A., Colunga-Garcia, M., Gage, S. H., & Landis, D. A. (2013). Long-Term Functional  
448 Dynamics of an Aphidophagous Coccinellid Community Remain Unchanged despite  
449 Repeated Invasions. *PLoS ONE*, *8*(12), e83407.  
450 <https://doi.org/10.1371/journal.pone.0083407>
- 451 Bahlai, C. A., Colunga-Garcia, M., Gage, S. H., & Landis, D. A. (2015). The role of exotic  
452 ladybeetles in the decline of native ladybeetle populations: Evidence from long-term

- 453 monitoring. *Biological Invasions*, 17(4), 1005–1024. <https://doi.org/10.1007/s10530-014->  
454 0772-4
- 455 Bates, D., Mächler, M., Bolker, B., & Walker, S. (2015). Fitting Linear Mixed-Effects Models  
456 Using lme4. *Journal of Statistical Software*, 67(1). <https://doi.org/10.18637/jss.v067.i01>
- 457 Berglund, H.-L., & Milberg, P. (2019). Sampling of flower-visiting insects: Poor correspondence  
458 between the catches of colour pan-trap and sweep netting. *European Journal of*  
459 *Entomology*, 116, 425–431. <https://doi.org/10.14411/eje.2019.043>
- 460 Borror, D. J., & White, R. E. (1998). *A field guide to insects: America north of Mexico*. Houghton  
461 Mifflin.
- 462 Bostanian, N. J., Boivin, G., & Goulet, H. (1983). Ramp Pitfall Trap. *Journal of Economic*  
463 *Entomology*, 76(6), 1473–1475. <https://doi.org/10.1093/jee/76.6.1473>
- 464 Bouchard, P., Wheeler, T. A., Goulet, H., Building, K. W. N., & Avenue, C. (2005). Ground  
465 beetles (Coleoptera: Carabidae) from alvar habitats in Ontario. *Journal of the*  
466 *Entomological Society of Ontario*, 136, 3–23.
- 467 Bouchard, P., Wheeler, T., & Goulet, H. (2000). Design for a low-cost, covered, ramp pitfall trap.  
468 *The Canadian Entomologist*, 132, 387–389. <https://doi.org/10.4039/Ent132387-3>
- 469 Brice, E. M., Larsen, E. J., & MacNulty, D. R. (2021). Sampling bias exaggerates a textbook  
470 example of a trophic cascade. *Ecology Letters*, 00(n/a), 1–12.  
471 <https://doi.org/10.1111/ele.13915>
- 472 Brown, G. R., & Matthews, I. M. (2016). A review of extensive variation in the design of pitfall  
473 traps and a proposal for a standard pitfall trap design for monitoring ground-active  
474 arthropod biodiversity. *Ecology and Evolution*, 6(12), 3953–3964.  
475 <https://doi.org/10.1002/ece3.2176>
- 476 Brunke, A., Newton, A., Klimaszewski, J., Majka, C., & Marshall, S. (2011). Staphylinidae of  
477 Eastern Canada and Adjacent United States. Key to Subfamilies; Staphylininae: Tribes

- 478 and Subtribes, and Species of Staphylinina. *Canadian Journal of Arthropod*  
479 *Identification*, 12, 1–110. <https://doi.org/10.3752/cjai.2011.12>
- 480 Busse, A., Bässler, C., Brandl, R., Friess, N., Hacker, H., Heidrich, L., Hilmers, T., Merkel-  
481 Wallner, G., Schmid-Egger, C., Seifert, L., & Müller, J. (2022). Light and Malaise traps  
482 tell different stories about the spatial variations in arthropod biomass and method-  
483 specific insect abundance. *Insect Conservation and Diversity*, icad.12592.  
484 <https://doi.org/10.1111/icad.12592>
- 485 Cardinale, B. J., Gonzalez, A., Allington, G. R. H., & Loreau, M. (2018). Is local biodiversity  
486 declining or not? A summary of the debate over analysis of species richness time trends.  
487 *Biological Conservation*, 219, 175–183. <https://doi.org/10.1016/j.biocon.2017.12.021>
- 488 Cates, A. M., Wills, B. D., Kim, T. N., Landis, D. A., Gratton, C., Read, H. W., & Jackson, R. D.  
489 (2021). No evidence of top-down effects by ants on litter decomposition in a temperate  
490 grassland. *Ecosphere*, 12(7), e03638. <https://doi.org/10.1002/ecs2.3638>
- 491 Didham, R. K., Basset, Y., Collins, C. M., Leather, S. R., Littlewood, N. A., Menz, M. H. M.,  
492 Müller, J., Packer, L., Saunders, M. E., Schönrogge, K., Stewart, A. J. A., Yanoviak, S.  
493 P., & Hassall, C. (2020). Interpreting insect declines: Seven challenges and a way  
494 forward. *Insect Conservation and Diversity*, 13(2), 103–114.  
495 <https://doi.org/10.1111/icad.12408>
- 496 Dowd, P. F., Bartelt, R. J., & Wicklow, D. T. (1992). Novel Insect Trap Useful in Capturing Sap  
497 Beetles (Coleoptera: Nitidulidae) and Other Flying Insects. *Journal of Economic*  
498 *Entomology*, 85(3), 772–778. <https://doi.org/10.1093/jee/85.3.772>
- 499 Elphick, C. S. (2008). How you count counts: The importance of methods research in applied  
500 ecology. *Journal of Applied Ecology*, 45(5), 1313–1320. [https://doi.org/10.1111/j.1365-](https://doi.org/10.1111/j.1365-2664.2008.01545.x)  
501 [2664.2008.01545.x](https://doi.org/10.1111/j.1365-2664.2008.01545.x)
- 502 Evans, A. V. (2014). *Beetles of Eastern North America*. Princeton University Press.



- 503 Ferro, M. L., & Summerlin, M. (2019). Developing a standardized p of entomological collection  
504 methods for use in databases. *ZooKeys*, 861, 145–156.  
505 <https://doi.org/10.3897/zookeys.861.32347>
- 506 Fiedler, A. K., & Landis, D. A. (2007). Attractiveness of Michigan Native Plants to Arthropod  
507 Natural Enemies and Herbivores. *Environmental Entomology*, 36(4), 751–765.  
508 <https://doi.org/10.1093/ee/36.4.751>
- 509 Fox, J., & Weisberg, S. (2019). *An {R} Companion to Applied Regression* (Third). Sage.  
510 <https://socialsciences.mcmaster.ca/jfox/Books/Companion/>
- 511 Gagic, V., Bartomeus, I., Jonsson, T., Taylor, A., Winqvist, C., Fischer, C., Slade, E. M., Steffan-  
512 Dewenter, I., Emmerson, M., Potts, S. G., Tscharrntke, T., Weisser, W., & Bommarco, R.  
513 (2015). Functional identity and diversity of animals predict ecosystem functioning better  
514 than species-based indices. *Proceedings of the Royal Society B: Biological Sciences*,  
515 282(1801), 20142620. <https://doi.org/10.1098/rspb.2014.2620>
- 516 Gardiner, M., DiFonzo, C., Brewer, M., & Noma, T. (2006). *Identifying Natural Enemies in Crops*  
517 *and Landscapes*. Michigan State University Extension.
- 518 Gardiner, M. M. (2015). *Good garden bugs: Everything you need to know about beneficial*  
519 *predatory insects*. Quarry Books.
- 520 Gardiner, M. M., Allee, L. L., Brown, P. M., Losey, J. E., Roy, H. E., & Smyth, R. R. (2012).  
521 Lessons from lady beetles: Accuracy of monitoring data from US and UK citizen-science  
522 programs. *Frontiers in Ecology and the Environment*, 10(9), 471–476.  
523 <https://doi.org/10.1890/110185>
- 524 Gardiner, M. M., Landis, D. A., Gratton, C., DiFonzo, C. D., O'Neal, M., Chacon, J. M., Wayo,  
525 M. T., Schmidt, N. P., Mueller, E. E., & Heimpel, G. E. (2009). Landscape diversity  
526 enhances biological control of an introduced crop pest in the north-central USA.  
527 *Ecological Applications*, 19(1), 143–154. <https://doi.org/10.1890/07-1265.1>

- 528 Gibson, D. R., Rowe, L., Isaacs, R., & Landis, D. A. (2019). Screening Drought-Tolerant Native  
529 Plants for Attractiveness to Arthropod Natural Enemies in the U.S. Great Lakes Region.  
530 *Environmental Entomology*, nvz134. <https://doi.org/10.1093/ee/nvz134>
- 531 Gonzalez, V. H., Osborn, A. L., Brown, E. R., Pavlick, C. R., Enríquez, E., Tscheulin, T.,  
532 Petanidou, T., Hranitz, J. M., & Barthell, J. F. (2020). Effect of pan trap size on the  
533 diversity of sampled bees and abundance of bycatch. *Journal of Insect Conservation*,  
534 24(3), 409–420. <https://doi.org/10.1007/s10841-020-00224-4>
- 535 Greenslade, P. J. M. (1964). Pitfall Trapping as a Method for Studying Populations of Carabidae  
536 (Coleoptera). *Journal of Animal Ecology*, 33(2), 301–310. <https://doi.org/10.2307/2632>
- 537 Henderson, P. A., & Southwood, T. R. E. (2016). *Ecological Methods* (4th ed.). John Wiley &  
538 Sons.
- 539 Hermann, S. L., Blackledge, C., Haan, N. L., Myers, A. T., & Landis, D. A. (2019). Predators of  
540 monarch butterfly eggs and neonate larvae are more diverse than previously recognised.  
541 *Scientific Reports*, 9(1), 14304. <https://doi.org/10.1038/s41598-019-50737-5>
- 542 Hill, M. O. (1973). Diversity and Evenness: A Unifying Notation and Its Consequences. *Ecology*,  
543 54(2), 427–432. <https://doi.org/10.2307/1934352>
- 544 Hohbein, R. R., & Conway, C. J. (2018). Pitfall traps: A review of methods for estimating  
545 arthropod abundance. *Wildlife Society Bulletin*, 42(4), 597–606.  
546 <https://doi.org/10.1002/wsb.928>
- 547 Isaac, N. J. B., Jarzyna, M. A., Keil, P., Dambly, L. I., Boersch-Supan, P. H., Browning, E.,  
548 Freeman, S. N., Golding, N., Guillera-Aroita, G., Henrys, P. A., Jarvis, S., Lahoz-  
549 Monfort, J., Pagel, J., Pescott, O. L., Schmucki, R., Simmonds, E. G., & O'Hara, R. B.  
550 (2020). Data Integration for Large-Scale Models of Species Distributions. *Trends in*  
551 *Ecology & Evolution*, 35(1), 56–67. <https://doi.org/10.1016/j.tree.2019.08.006>
- 552 Joshi, N., Leslie, T., Rajotte, E., Kammerer, M., Otieno, M., & Biddinger, D. (2015). Comparative  
553 Trapping Efficiency to Characterize Bee Abundance, Diversity and Community

- 554           Composition in Apple Orchards. *Annals of the Entomological Society of America*, 108,  
555           785–799. <https://doi.org/10.1093/aesa/sav057>
- 556 Kindt, R., & Coe, R. (2005). *Tree diversity analysis: A manual and software for common*  
557           *statistical methods for ecological and biodiversity studies*. World Agroforestry Centre.
- 558 Klimaszewski, J., Webster, R. P., Langor, D. W., Brunke, A., Davies, A., Bourdon, C.,  
559           Labrecque, M., Newton, A. F., Dorval, J.-A., & Frank, J. H. (2018). *Aleocharine Rove*  
560           *Beetles of Eastern Canada (Coleoptera, Staphylinidae, Aleocharinae): A Glimpse of*  
561           *Megadiversity*. Springer International Publishing. [https://doi.org/10.1007/978-3-319-](https://doi.org/10.1007/978-3-319-77344-5)  
562           77344-5
- 563 Knuff, A. K., Winiger, N., Klein, A.-M., Segelbacher, G., & Staab, M. (2019). Optimizing  
564           sampling of flying insects using a modified window trap. *Methods in Ecology and*  
565           *Evolution*, 10(10), 1820–1825. <https://doi.org/10.1111/2041-210X.13258>
- 566 Koivula, M. (2011). Useful model organisms, indicators, or both? Ground beetles (Coleoptera,  
567           Carabidae) reflecting environmental conditions. *ZooKeys*, 100, 287–317.  
568           <https://doi.org/10.3897/zookeys.100.1533>
- 569 Kuznetsova, A., Brockhoff, P. B., & Christensen, R. H. B. (2017). lmerTest Package: Tests in  
570           Linear Mixed Effects Models. *Journal of Statistical Software*, 82(13).  
571           <https://doi.org/10.18637/jss.v082.i13>
- 572 Larochelle, A., & Larivière, M.-C. (2003). *A natural history of the ground-beetles (Coleoptera:*  
573           *Carabidae) of America north of Mexico*. Pensoft Publ.
- 574 Lenth, R. V. (2021). *Emmeans: Estimated Marginal Means, aka Least-Squares Means*. R  
575           *package version 1.6.2-1*. <https://CRAN.R-project.org/package=emmeans>
- 576 Levesque, C., & Levesque, G.-Y. (1995). Abundance, Diversity and Dispersal Power of Rove  
577           Beetles (Coleoptera: Staphylinidae) in a Raspberry Plantation and Adjacent Sites in  
578           Eastern Canada. *Journal of the Kansas Entomological Society*, 68(3), 355–370.

- 579 Li, W., Wang, D., Li, M., Gao, Y., Wu, J., & Yang, X. (2021). Field detection of tiny pests from  
580 sticky trap images using deep learning in agricultural greenhouse. *Computers and*  
581 *Electronics in Agriculture*, 183, 106048. <https://doi.org/10.1016/j.compag.2021.106048>
- 582 Lindroth, C. H. (1961). The ground-beetles (Carabidae, excl. Cincindelinae) of Canada and  
583 Alaska. *Opuscula Entomologica Supplementa*, 1–6, 1–1192.
- 584 Mabin, M. D., Welty, C., & Gardiner, M. M. (2020). Predator richness predicts pest suppression  
585 within organic and conventional summer squash (*Cucurbita pepo* L. Cucurbitales:  
586 Cucurbitaceae). *Agriculture, Ecosystems & Environment*, 287, 106689.  
587 <https://doi.org/10.1016/j.agee.2019.106689>
- 588 Marshall, S. A. (2017). *Insects: Their natural history and diversity with a photographic guide to*  
589 *insects of eastern North America* (Second edition). Firefly Books.
- 590 Martinez Arbizu, P. (2020). *PairwiseAdonis: Pairwise multilevel comparison using adonis. R*  
591 *package version 0.4*. <https://github.com/pmartinezarbizu/pairwiseAdonis>
- 592 Michener, W. K., & Jones, M. B. (2012). Ecoinformatics: Supporting ecology as a data-intensive  
593 science. *Trends in Ecology & Evolution*, 27(2), 85–93.  
594 <https://doi.org/10.1016/j.tree.2011.11.016>
- 595 McNamara Manning, Katherine. (2022). *katiemanning/jar\_ramp\_trap*: Study data and code.
- 596 Montgomery, G. A., Belitz, M. W., Guralnick, R. P., & Tingley, M. W. (2021). Standards and Best  
597 Practices for Monitoring and Benchmarking Insects. *Frontiers in Ecology and Evolution*,  
598 8, 579193. <https://doi.org/10.3389/fevo.2020.579193>
- 599 Muppudathi, S., Renukadevi, P., Ganapathy, N., Kennedy, J., & Subbarayalu, M. (2018).  
600 Coloured sticky traps to monitor thrips population in cotton. *Journal of Entomology and*  
601 *Zoology Studies*, 6, 948–952.
- 602 Musters, C. J. M., Evans, T. R., Wiggers, J. M. R., van 't-Zelfde, M., & de Snoo, G. R. (2021).  
603 Distribution of flying insects across landscapes with intensive agriculture in temperate  
604 areas. *Ecological Indicators*, 129, 107889. <https://doi.org/10.1016/j.ecolind.2021.107889>

- 605 O'Connor, R. S., Kunin, W. E., Garratt, M. P. D., Potts, S. G., Roy, H. E., Andrews, C., Jones,  
606 C. M., Peyton, J. M., Savage, J., Harvey, M. C., Morris, R. K. A., Roberts, S. P. M.,  
607 Wright, I., Vanbergen, A. J., & Carvell, C. (2019). Monitoring insect pollinators and flower  
608 visitation: The effectiveness and feasibility of different survey methods. *Methods in*  
609 *Ecology and Evolution*, 10(12), 2129–2140. <https://doi.org/10.1111/2041-210X.13292>
- 610 Oehlschlager, A. C., Gonzalez, L., Gomez, M., Rodriguez, C., & Andrade, R. (2002).  
611 Pheromone-Based Trapping of West Indian Sugarcane Weevil in Sugarcane Plantation.  
612 *Journal of Chemical Ecology*, 28(8), 1653–1664.  
613 <https://doi.org/10.1023/A:1019936831696>
- 614 Oksanen, J., Blanchet, F. G., Friendly, M., Kindt, R., Legendre, P., McGlinn, D., Minchin, P. R.,  
615 O'Hara, R. B., Simpson, G., Solymos, P., Stevens, M. H. H., Szoecs, E., & Wagner, H.  
616 (2019). *Vegan= Community Ecology Package*. [https://CRAN.R-](https://CRAN.R-project.org/package=vegan)  
617 [project.org/package=vegan](https://CRAN.R-project.org/package=vegan)
- 618 Osborne, J., Loxdale, H., & Woiwod, I. P. (2002). *Monitoring insect dispersal: Methods and*  
619 *approaches* (pp. 24–49).
- 620 Owino, E. A. (2011). Sampling of *An.gambiae* s.s mosquitoes using Limburger cheese, heat and  
621 moisture as baits in a homemade trap. *BMC Research Notes*, 4(1), 284.  
622 <https://doi.org/10.1186/1756-0500-4-284>
- 623 Patrick, L. B., & Hansen, A. (2013). Comparing ramp and pitfall traps for capturing wandering  
624 spiders. *Journal of Arachnology*, 41(3), 404–406. <https://doi.org/10.1636/Hi12-52.1>
- 625 Perry, K. I., Hoekstra, N. C., Delgado de la flor, Y. A., & Gardiner, M. M. (2020). Disentangling  
626 landscape and local drivers of ground-dwelling beetle community assembly in an urban  
627 ecosystem. *Ecological Applications*, 30(8). <https://doi.org/10.1002/eap.2191>
- 628 Pielou, E. C. (1966). The measurement of diversity in different types of biological collections.  
629 *Journal of Theoretical Biology*, 13, 131–144. [https://doi.org/10.1016/0022-](https://doi.org/10.1016/0022-5193(66)90013-0)  
630 [5193\(66\)90013-0](https://doi.org/10.1016/0022-5193(66)90013-0)



- 631 Prendergast, K. S., Menz, M. H. M., Dixon, K. W., & Bateman, P. W. (2020). The relative  
632 performance of sampling methods for native bees: An empirical test and review of the  
633 literature. *Ecosphere*, 11(5), e03076. <https://doi.org/10.1002/ecs2.3076>
- 634 R Core Team. (2022). *R: A Language and Environment for Statistical Computing*. R Foundation  
635 for Statistical Computing. <https://www.R-project.org/>
- 636 Rainio, J., & Niemela, J. (2003). Ground beetles (Coleoptera: Carabidae) as bioindicators.  
637 *Biodiversity and Conservation*, 487–503. <https://doi.org/10.1023/A:1022412617568>
- 638 Reddy, G., Cruz, Z., Naz, F., & Muniappan, R. (2008). A Pheromone-Based Trapping System  
639 for Monitoring the Population of *Cosmopolites Sordidus* (Germar) (Coleoptera:  
640 Curculionidae). *Journal of Plant Protection Research*, 48, 515–527.  
641 <https://doi.org/10.2478/v10045-009-0001-1>
- 642 Reddy, G. V. P., Cruz, Z. T., & Guerrero, A. (2009). Development of an Efficient Pheromone-  
643 Based Trapping Method for the Banana Root Borer *Cosmopolites sordidus*. *Journal of*  
644 *Chemical Ecology*, 35(1), 111–117. <https://doi.org/10.1007/s10886-008-9580-6>
- 645 Russo, L., Stehouwer, R., Heberling, J. M., & Shea, K. (2011). The Composite Insect Trap: An  
646 Innovative Combination Trap for Biologically Diverse Sampling. *PLoS ONE*, 6(6),  
647 e21079. <https://doi.org/10.1371/journal.pone.0021079>
- 648 Saunders, S. P., Farr, M. T., Wright, A. D., Bahlai, C. A., Ribeiro, J. W., Rossman, S., Sussman,  
649 A. L., Arnold, T. W., & Zipkin, E. F. (2019). Disentangling data discrepancies with  
650 integrated population models. *Ecology*, 100(6), e02714. <https://doi.org/10.1002/ecy.2714>
- 651 Serap, S., & Luff, M. (2010). Ground beetles (Coleoptera: Carabidae) as bioindicators of human  
652 impact. *Munis Entomology and Zoology*, 5, 209–214.
- 653 Shimoda, M., & Honda, K. (2013). Insect reactions to light and its applications to pest  
654 management. *Applied Entomology and Zoology*, 48(4), 413–421.  
655 <https://doi.org/10.1007/s13355-013-0219-x>

- 656 Shin, Y. K., Kim, S. B., & Kim, D.-S. (2020). Attraction characteristics of insect pests and natural  
657 enemies according to the vertical position of yellow sticky traps in a strawberry farm with  
658 high-raised bed cultivation. *Journal of Asia-Pacific Entomology*, 23(4), 1062–1066.  
659 <https://doi.org/10.1016/j.aspen.2020.08.016>
- 660 Southwood, T. R. E. (1978). *Ecological Methods* (2nd ed.). Springer Netherlands.  
661 <https://doi.org/10.1007/978-94-009-1225-0>
- 662 Spence, J. R., & Niemelä, J. K. (1994). Sampling Carabid assemblages with pitfall traps: The  
663 madness and the method. *The Canadian Entomologist*, 126(3), 881–894.  
664 <https://doi.org/10.4039/Ent126881-3>
- 665 Sultaire, S. M., Kroll, A. J., Verschuyf, J., Landis, D. A., & Roloff, G. J. (2021). Effects of varying  
666 retention tree patterns on ground beetle (Coleoptera: Carabidae) taxonomic and  
667 functional diversity. *Ecosphere*, 12(7), e03641. <https://doi.org/10.1002/ecs2.3641>
- 668 Toler, T., Evans, E., & Tepedino, V. (2005). Pan-trapping for bees (Hymenoptera: Apiformes) in  
669 Utah's West Desert: the importance of color diversity. *The Pan-Pacific Entomologist*, 81,  
670 103–113.
- 671 Tuell, J. K., & Isaacs, R. (2009). Elevated pan traps to monitor bees in flowering crop canopies.  
672 *Entomologia Experimentalis et Applicata*, 131, 93–98. [https://doi.org/10.1111/j.1570-](https://doi.org/10.1111/j.1570-7458.2009.00826.x)  
673 [7458.2009.00826.x](https://doi.org/10.1111/j.1570-7458.2009.00826.x)
- 674 Vallecillo, D., Gauthier-Clerc, M., Guillemain, M., Vittecoq, M., Vandewalle, P., Roche, B., &  
675 Champagnon, J. (2020). Reliability of animal counts and implications for the  
676 interpretation of trends. *Ecology and Evolution*, n/a(n/a).  
677 <https://doi.org/10.1002/ece3.7191>
- 678 Vrdoljak, S., & Samways, M. (2012). Optimising colored pan traps to survey flower visiting  
679 insects. *Journal of Insect Conservation*, 16, 1–10. [https://doi.org/10.1007/s10841-011-](https://doi.org/10.1007/s10841-011-9420-9)  
680 [9420-9](https://doi.org/10.1007/s10841-011-9420-9)

- 681 Weary, B. P., Mendez, P. K., Lew, S. E., Nyman, B. L., & Will, K. W. (2019). Performance of  
682 ramp and pitfall traps for arthropods and non-target vertebrates in Californian oak  
683 woodland and chaparral habitats. *Pan-Pacific Entomologist*, *95*(1), 21–32.  
684 <https://doi.org/10.3956/2019-95.1.21>
- 685 Webb, C. T., Hoeting, J. A., Ames, G. M., Pyne, M. I., & LeRoy Poff, N. (2010). A structured and  
686 dynamic framework to advance traits-based theory and prediction in ecology. *Ecology*  
687 *Letters*, *13*(3), 267–283. <https://doi.org/10.1111/j.1461-0248.2010.01444.x>
- 688 White, P. J. T., Glover, K., Stewart, J., & Rice, A. (2016). The Technical and Performance  
689 Characteristics of a Low-Cost, Simply Constructed, Black Light Moth Trap. *Journal of*  
690 *Insect Science*, *16*(1), 25. <https://doi.org/10.1093/jisesa/iew011>
- 691 Whitworth, A., Villacampa, J., Serrano Rojas, S. J., Downie, R., & MacLeod, R. (2017). Methods  
692 matter: Different biodiversity survey methodologies identify contrasting biodiversity  
693 patterns in a human modified rainforest — A case study with amphibians. *Ecological*  
694 *Indicators*, *72*, 821–832. <https://doi.org/10.1016/j.ecolind.2016.08.055>
- 695 Wills, B. D., Kim, T. N., Fox, A. F., Gratton, C., & Landis, D. A. (2019). Reducing Native Ant  
696 Abundance Decreases Predation Rates in Midwestern Grasslands. *Environmental*  
697 *Entomology*, *48*(6), 1360–1368. <https://doi.org/10.1093/ee/nvz127>
- 698 Wood, T. J., Holland, J. M., & Goulson, D. (2015). A comparison of techniques for assessing  
699 farmland bumblebee populations. *Oecologia*, *177*(4), 1093–1102.  
700 <https://doi.org/10.1007/s00442-015-3255-0>

701  
702  
703  
704  
705  
706  
707  
708  
709

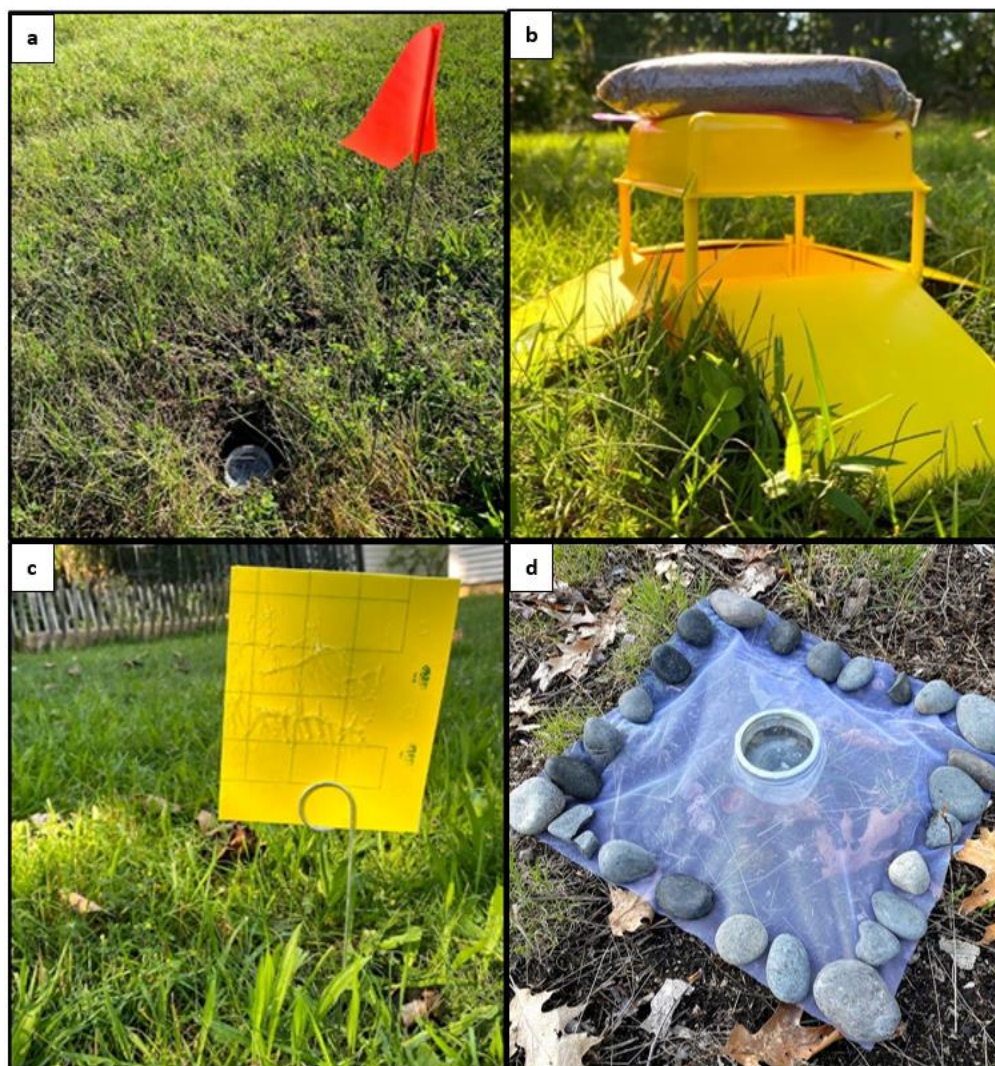

710  
711  
712  
713

Figure 1: Arthropod traps: pitfall (a), yellow ramp trap (b), yellow sticky card (c), jar ramp trap (d) deployed at sampling sites in Kent, Ohio.



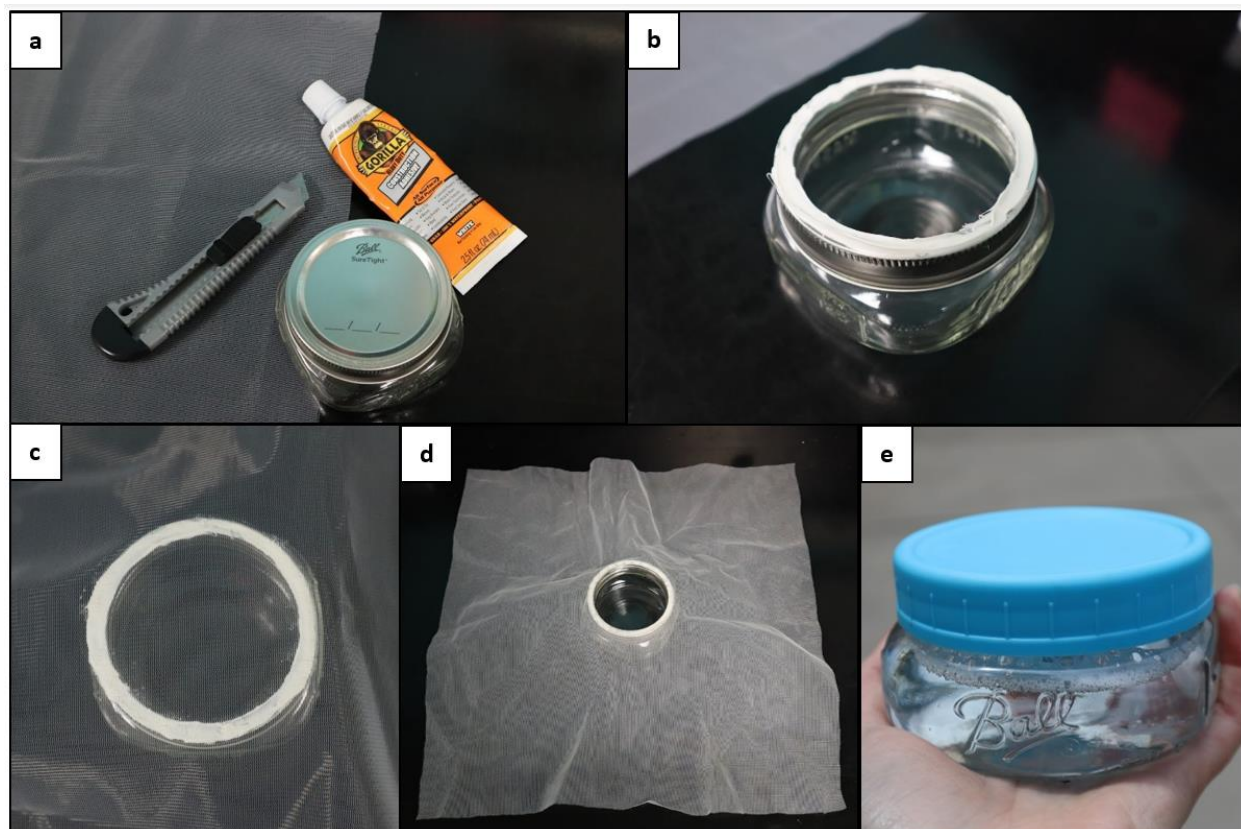

714  
715  
716

Figure 2: Step by step photos of jar ramp trap construction.



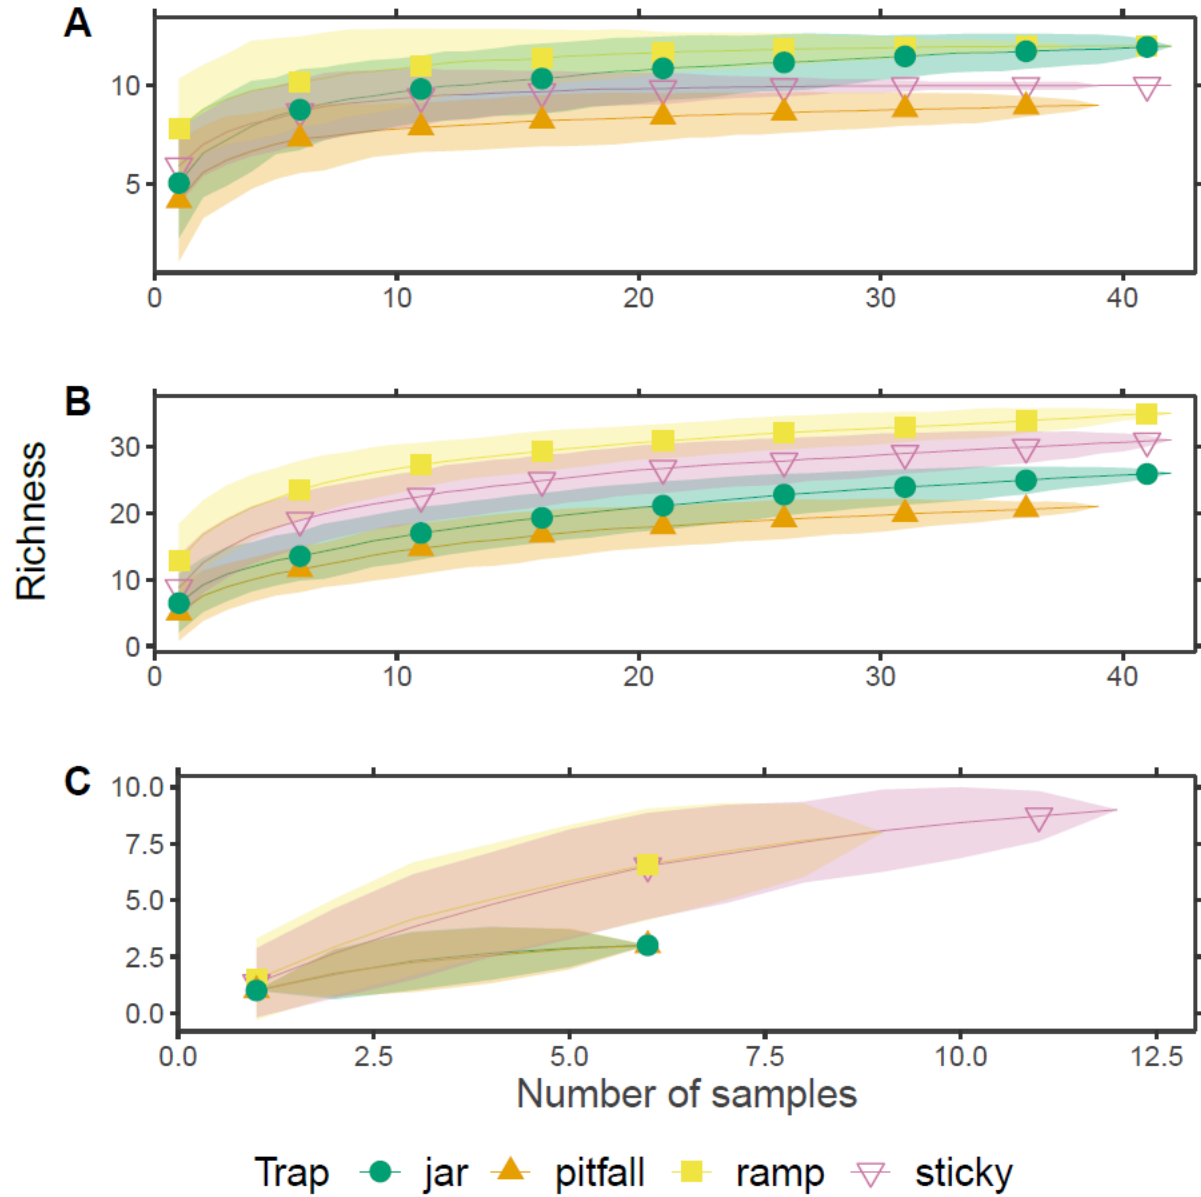

717

718

719

720

Figure 3: Taxon richness accumulation curves for each trap type by identification level: (A) order, (B) functional, (C) focal taxa.

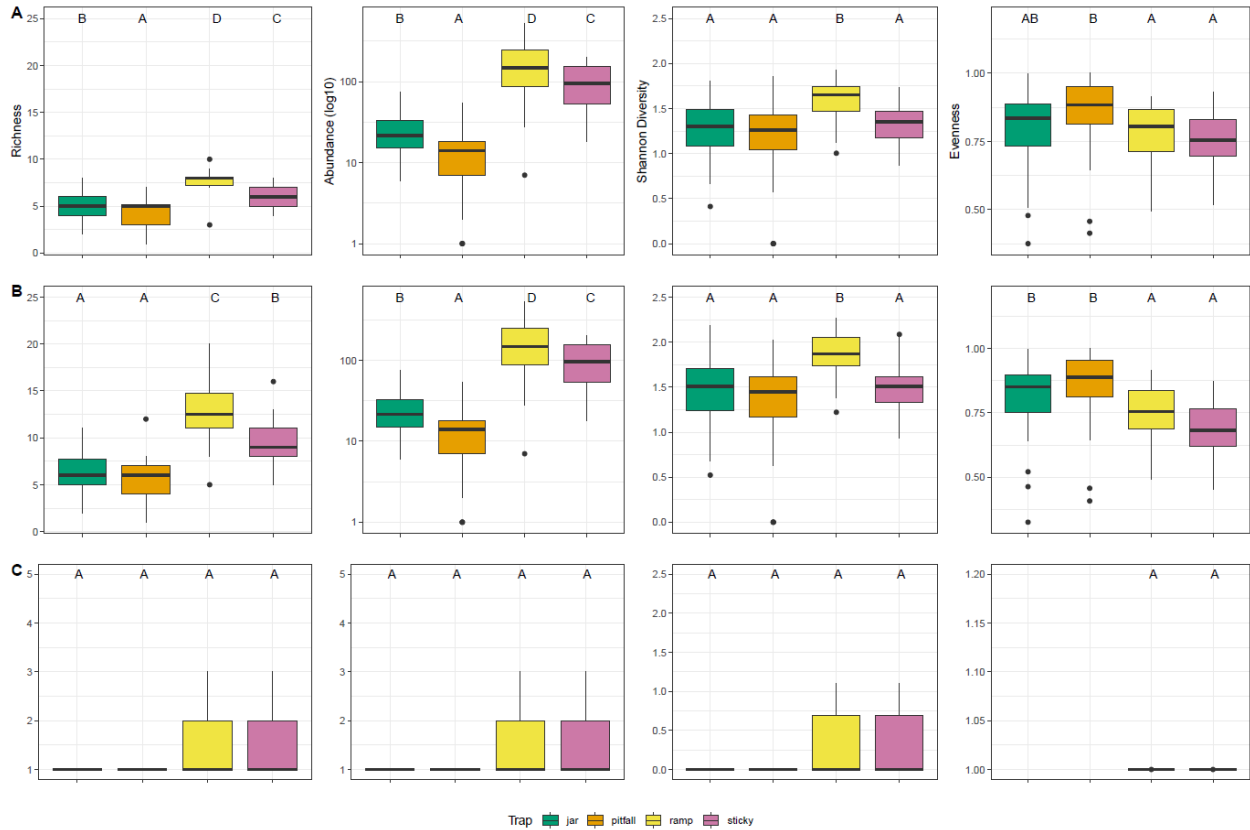

721  
722  
723  
724  
725

Figure 4: Richness, abundance (log 10), Shannon diversity, and evenness between trap types on the identification level of: (A) Order, (B) Functional, (C) Focal taxa. Letters shared indicate no statistical difference in estimated marginal means by Tukey method,  $P < 0.05$ .

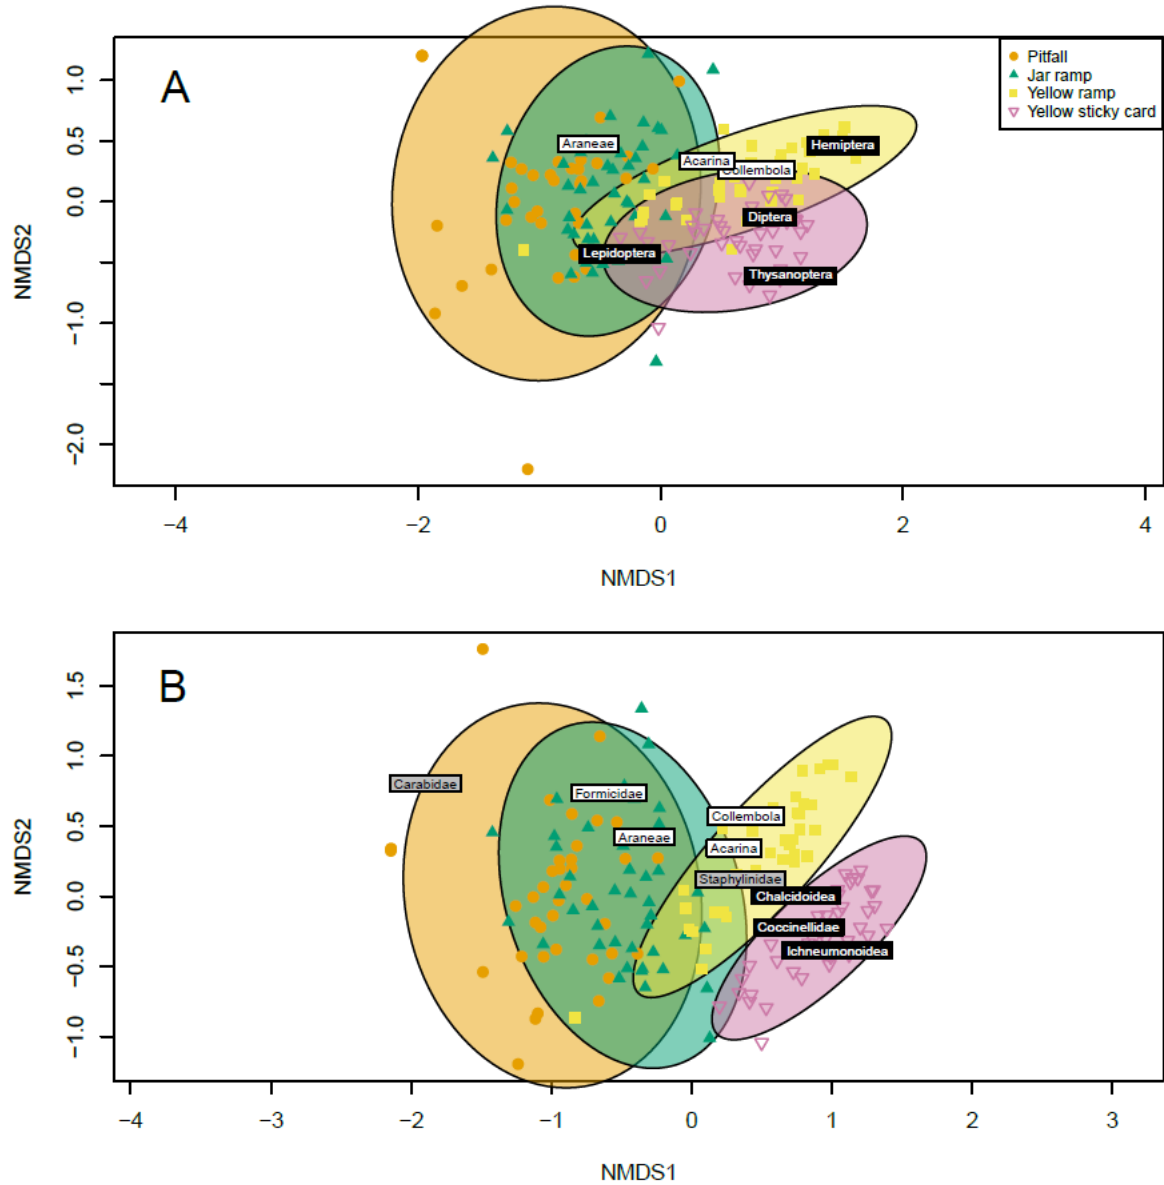

726  
727  
728  
729  
730  
731

Figure 5: Non-metric multidimensional scaling (NMDS) of arthropod community composition in each of four trap types deployed in managed grasslands in Kent, Ohio (USA) in 2020. (A) Order: stress = 0.14, (B) functional: stress = 0.15. Ellipsoids represent 95% confidence of the mean for trap types. Points displayed represent community composition for each trap type. Select flying guild taxa displayed as white text on black boxes, background and ground-crawling guild taxa displayed as black text on in white boxes, background and intermediate in grey boxes.

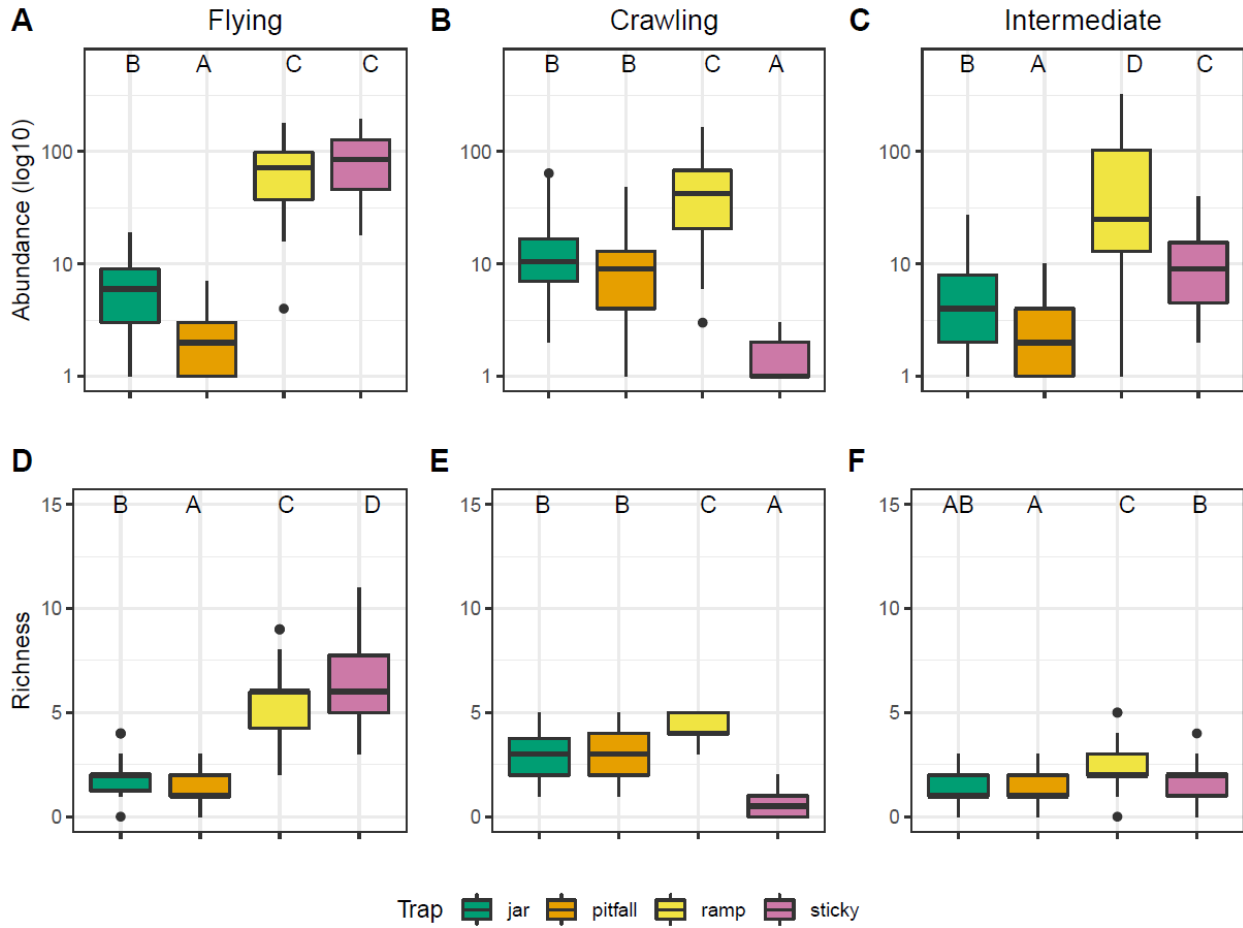

732

733 Figure 6: Flying, crawling, and intermediate mobility arthropod abundance and richness by trap type. (A) flying  
734 abundance, (B) crawling abundance, (C) intermediate abundance, (D) flying richness, (E) crawling richness, (F)  
735 intermediate richness. Note that abundance was log10 transformed. Letters shared indicate no statistical difference  
736 in estimated marginal means by Tukey method,  $P < 0.05$ .

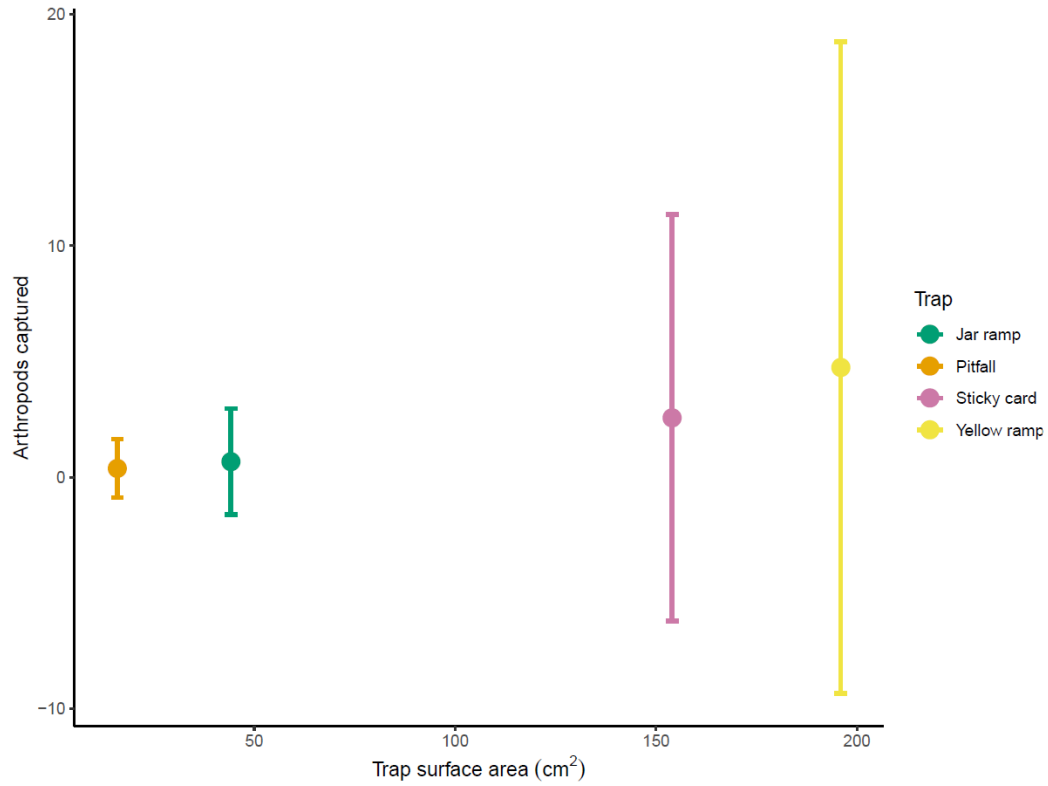

737

738 Figure S1: Arthropods captured in each trap type by surface area of the trap opening. The variability of arthropods  
739 captured and mean catch increased with trap surface area.

740

741

742

743

744

745

746

747

748

749

750

751
